# Supplementary material for: Comparison of the Prognostic Value of Systemic Inflammation Response Markers in Small Cell Lung Cancer Patients
Source: PubMed Central journal article supplement — J Cancer. 2019 Apr 3;10(7):1685–92. doi: 10.7150/jca.29319 (PMC6547997; doi:10.7150/jca.29319), 2019-04-03
Supplement: jcav10p1685s1.pdf [file jcav10p1685s1.pdf]

**Figure S1**

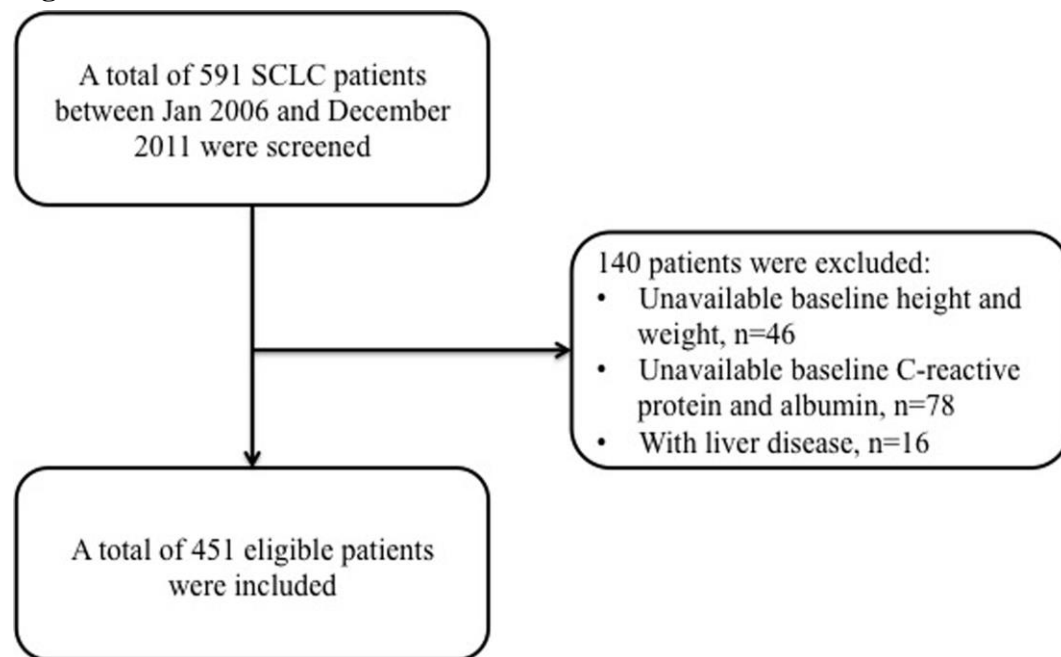

**Table S1** Scoring criteria of all systemic inflammation response markers

|                | <b>Group 1</b> | <b>Group 2</b> | <b>Group 3</b> |
|----------------|----------------|----------------|----------------|
| <b>mGPS</b>    | 0              | 1              | 2              |
| <b>CRP/ALB</b> | $\leq 0.44$    | $> 0.44$       | -              |
| <b>AGR</b>     | $\leq 1.25$    | $> 1.25$       | -              |
| <b>PNI</b>     | $\leq 37.5$    | $> 37.5$       | -              |
| <b>ALI</b>     | $\leq 47.0$    | $> 47.0$       | -              |
